# Supplementary material for: Astakine 2—the Dark Knight Linking Melatonin to Circadian Regulation in Crustaceans
Source: PLOS journal article supplement (doi:10.1371/journal.pgen.1003361), 2013-03-21
Supplement: S10 (10.1371/journal.pgen.1003361.s010) [file journal.pgen.1003361.s010]

**Supporting Information**

**Table S2.** Sequences of the primers used in this study.

| **Experiment** | **Primers** | **Nucleotide sequence (5¢-3¢)** |
| --- | --- | --- |
| For 5¢ RACE | *Pl*RACK1_GSP1 | 5¢-TCT TGC CAG CAG CCA GAT CCC AAA GCCG- 3¢ |
|  | *Pl*RACK1_NGSP1 | 5¢-CCA TGA ACC CGA CAA ATC GAA GTG TCCA- 3¢ |
|  | *Pl*BMAL1_F2 | 5'-CTA GAT ACT TCA AGA TTA GGC AG-3' |
| For 3¢ RACE | *Pl*RACK1_GSP2 | 5¢ -TGT TTC CTG TGG GAT GGG ACA AGG CAG- 3¢ |
|  | *Pl*RACK1_NGSP2 | 5¢ -CTT TGT GTG CTT CAG GTG GCA AGG ATGC- 3¢ |
|  | *Pl*BMAL1_R2 | 5'-GGT CTT GTG TGT CTC AGC CAG G-3' |
| Plasmid construction | RACK1_F1 | 5¢ -GGA TCC ATG AAC GAG AGC CTT CAG CTG- 3¢ |
|  | RACK1_R1 | 5¢ -GTC GAC GTG CAC GGG AAG TGA CACT- 3¢ |
|  | *Pl*BMAL1_F1 | 5¢ -GAA TTC ATG TTT GGG ATG AGC AAC TT- 3¢ |
|  | *Pl*BMAL1_R1pGEX | 5'- CTC GAG GGG AAG TGG CCA AGG AAG GT -3' |
|  | *Pl*BMAL1_ R1pET | 5'- CTC GAG TGG GAA GTG GCC AAG GAA GGT-3' |
| Tissue distribution | *Pl*RACK1_F2 | 5'-TTC ATG GGA CGA GAC ACT GCG GC-3' |
|  | *Pl*RACK1_R2 | 5'-CAC ACA AAG AGC CAT CAG GTG ATAC-3' |
|  | *Pl*BMAL1_F2 | 5'-CTA GAT ACT TCA AGA TTA GGC AG-3' |
|  | *Pl*BMAL1_R2 | 5'-GGT CTT GTG TGT CTC AGC CAG G-3' |
|  | 40S_F | 5'-CCA GGA CCC CCA AAC TTC TTA G-3' |
|  | 40S_R | 5'-GAA AAC TGC CAC AGC CGT TG-3' |
| qPCR | qAST2_F | 5¢-ATG GTG TTA GTG TTG ATG TGT GGC- 3¢ |
|  | qAST2_R | 5¢- GGG ACT CAG CGG AGA TTT TGC - 3¢ |
|  | q40S ribosomal_F | 5¢- GAC GAA TGG CAT ACA CCT GAG AGG- 3¢ |
|  | q40S ribosomal_R | 5¢ -CAG GAC TCT GCA GTT CAA GCT GAT G- 3¢ |
|  | qCLK_F | 5¢ -CAT GCC ATT TGA AGT GTT GG- 3¢ |
|  | qCLK_R | 5¢ -TGT AGC CAG ATC CAC TGC TG - 3¢ |
|  | q*Pl*BMAL1_F | 5¢ - CTA GAT ACT TCA AGA TTA GGC AG - 3¢ |
|  | q*Pl*BMAL1_R | 5¢ - GGT CTT GTG TGT CTC AGC CAG G - 3¢ |
|  | *Pl*RACK1_F2 | 5'-TTC ATG GGA CGA GAC ACT GCG GC-3' |
|  | *Pl*RACK1_R2 | 5'-GGT CTT GTG TGT CTC AGC CAG G-3' |
|  | qAST1_F | 5'- GGC TAT GGC TGG CTC TTG TAA -3' |
|  | qAST1_R | 5'- AGG TGG CTG AAG GTC GGG -3' |
